# Supplementary material for: Prognostic role of elevated mir-24-3p in breast cancer and its association with the metastatic process
Source: PubMed Central journal article supplement (PMC5849180; doi:10.18632/oncotarget.24403), 2018-02-05
Supplement: oncotarget-09-12868-s004.pdf [file oncotarget-09-12868-s004.pdf]

Assay Class: Eukaryote Total RNA Pico  
 Data Path: C:\...Eukaryote Total RNA Pico\_DE72903144\_2015-05-04\_12-48-12.xad

Created: 5/4/2015 12:48:11 PM  
 Modified: 9/13/2017 3:37:51 PM

**Electropherogram Summary**

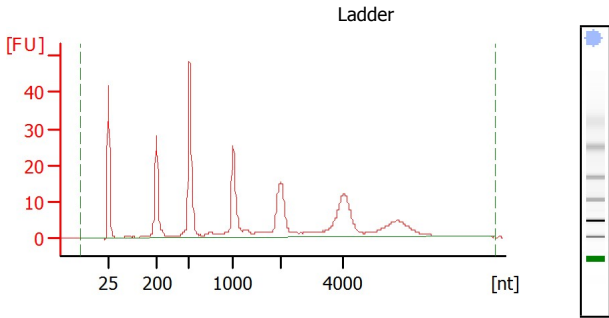

**Overall Results for Ladder**

RNA Area: 336.6  
 RNA Concentration: 1,000 pg/μl  
 Result Flagging Color:    
 Result Flagging Label: All Other Samples

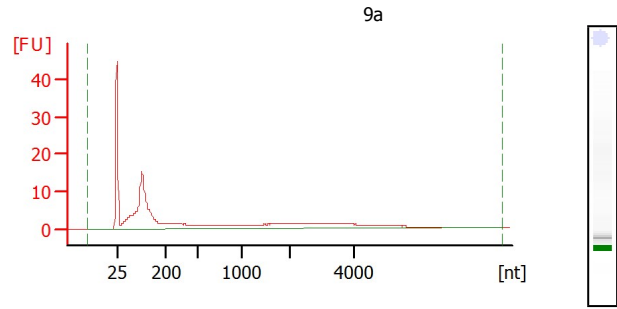

**Overall Results for sample 1 : 9a**

RNA Area: 159.4  
 RNA Concentration: 474 pg/μl  
 rRNA Ratio [28s / 18s]: 0.0  
 RNA Integrity Number (RIN): 1.9 (B.02.08)  
 Result Flagging Color:    
 Result Flagging Label: RIN: 1.90

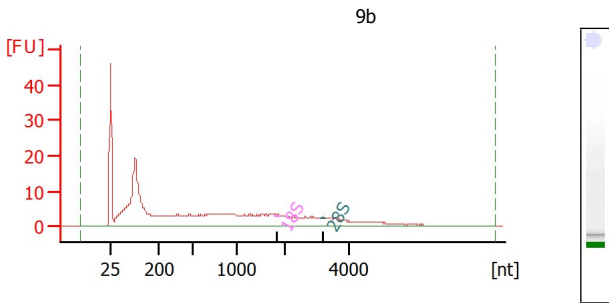

**Overall Results for sample 2 : 9b**

RNA Area: 298.3  
 RNA Concentration: 886 pg/μl  
 rRNA Ratio [28s / 18s]: 0.5  
 RNA Integrity Number (RIN): 2.4 (B.02.08)  
 Result Flagging Color:    
 Result Flagging Label: RIN: 2.40

**Fragment table for sample 2 : 9b**

| Name | Start Size [nt] | End Size [nt] | Area | % of total Area |
|------|-----------------|---------------|------|-----------------|
| 18S  | 1,803           | 1,899         | 0.2  | 0.1             |
| 28S  | 3,146           | 3,251         | 0.1  | 0.0             |

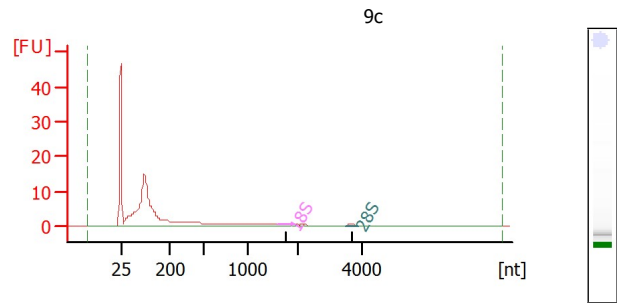

**Overall Results for sample 3 : 9c**

RNA Area: 131.8  
 RNA Concentration: 392 pg/μl  
 rRNA Ratio [28s / 18s]: 0.7  
 RNA Integrity Number (RIN): 2.4 (B.02.08)  
 Result Flagging Color:    
 Result Flagging Label: RIN: 2.40

**Fragment table for sample 3 : 9c**

| Name | Start Size [nt] | End Size [nt] | Area | % of total Area |
|------|-----------------|---------------|------|-----------------|
| 18S  | 1,622           | 1,950         | 0.7  | 0.6             |
| 28S  | 3,525           | 3,848         | 0.5  | 0.4             |

Assay Class: Eukaryote Total RNA Pico  
 Data Path: C:\...Eukaryote Total RNA Pico\_DE72903144\_2015-05-04\_12-48-12.xad

Created: 5/4/2015 12:48:11 PM  
 Modified: 9/13/2017 3:37:51 PM

**Electropherogram Summary Continued ...**

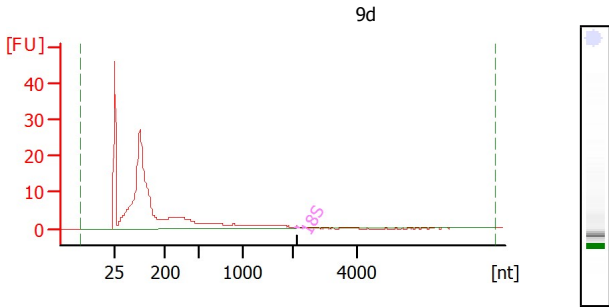

**Overall Results for sample 4 : 9d**  
 RNA Area: 230.4  
 RNA Concentration: 685 pg/µl  
 rRNA Ratio [28s / 18s]: 0.0  
 RNA Integrity Number (RIN): 2.5 (B.02.08)  
 Result Flagging Color:    
 Result Flagging Label: RIN: 2.50

**Fragment table for sample 4 : 9d**

| Name | Start Size [nt] | End Size [nt] | Area | % of total Area |
|------|-----------------|---------------|------|-----------------|
| 18S  | 2,096           | 2,199         | 0.2  | 0.1             |

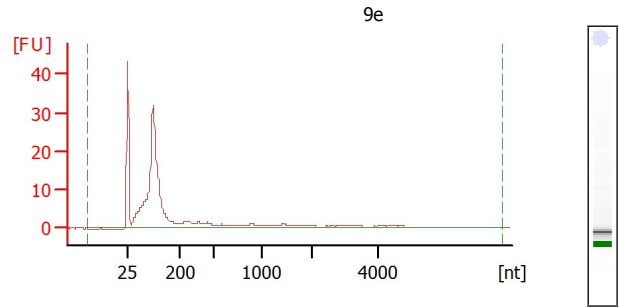

**Overall Results for sample 5 : 9e**  
 RNA Area: 207.7  
 RNA Concentration: 617 pg/µl  
 rRNA Ratio [28s / 18s]: 0.0  
 RNA Integrity Number (RIN): 2.5 (B.02.08)  
 Result Flagging Color:    
 Result Flagging Label: RIN: 2.50

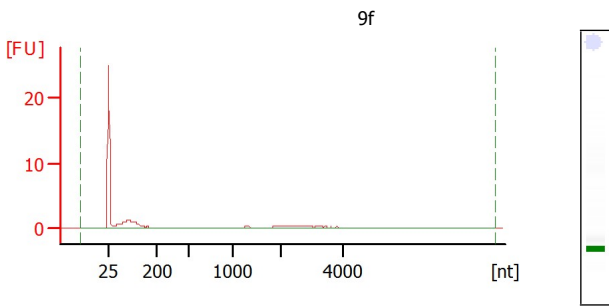

**Overall Results for sample 6 : 9f**  
 RNA Area: 19.4  
 RNA Concentration: 58 pg/µl  
 rRNA Ratio [28s / 18s]: 0.0  
 RNA Integrity Number (RIN): 1 (B.02.08)  
 Result Flagging Color:    
 Result Flagging Label: RIN:1

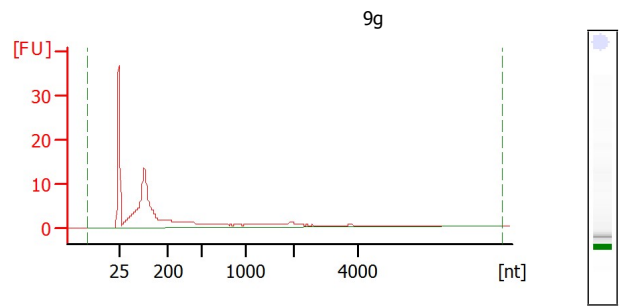

**Overall Results for sample 7 : 9g**  
 RNA Area: 125.7  
 RNA Concentration: 374 pg/µl  
 rRNA Ratio [28s / 18s]: 0.0  
 RNA Integrity Number (RIN): 2.4 (B.02.08)  
 Result Flagging Color:    
 Result Flagging Label: RIN: 2.40

Assay Class: Eukaryote Total RNA Pico  
 Data Path: C:\...Eukaryote Total RNA Pico\_DE72903144\_2015-05-04\_12-48-12.xad

Created: 5/4/2015 12:48:11 PM  
 Modified: 9/13/2017 3:37:51 PM

**Electropherogram Summary Continued ...**

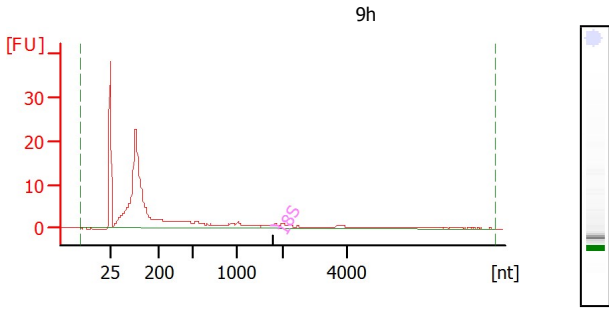

**Overall Results for sample 8 :** 9h  
 RNA Area: 180.0  
 RNA Concentration: 535 pg/µl  
 rRNA Ratio [28s / 18s]: 0.0  
 RNA Integrity Number (RIN): 2.5 (B.02.08)  
 Result Flagging Color:    
 Result Flagging Label: RIN: 2.50

**Fragment table for sample 8 :** 9h

| Name | Start Size [nt] | End Size [nt] | Area | % of total Area |
|------|-----------------|---------------|------|-----------------|
| 18S  | 1,722           | 1,863         | 0.5  | 0.3             |

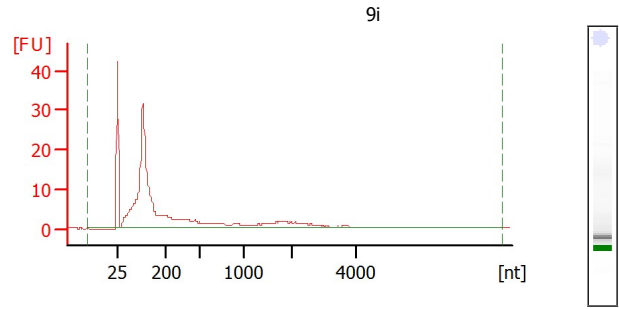

**Overall Results for sample 9 :** 9i  
 RNA Area: 231.8  
 RNA Concentration: 689 pg/µl  
 rRNA Ratio [28s / 18s]: 0.0  
 RNA Integrity Number (RIN): 2.5 (B.02.08)  
 Result Flagging Color:    
 Result Flagging Label: RIN: 2.50

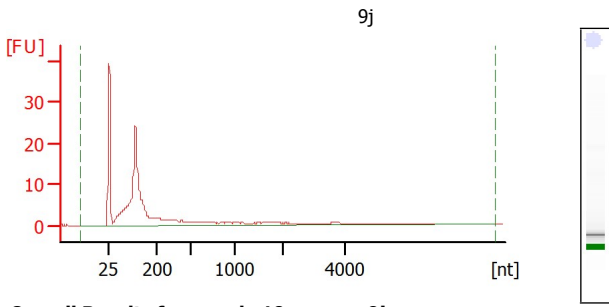

**Overall Results for sample 10 :** 9j  
 RNA Area: 147.3  
 RNA Concentration: 438 pg/µl  
 rRNA Ratio [28s / 18s]: 0.0  
 RNA Integrity Number (RIN): 2.5 (B.02.08)  
 Result Flagging Color:    
 Result Flagging Label: RIN: 2.50

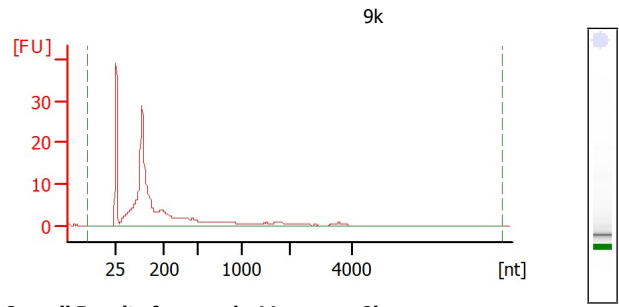

**Overall Results for sample 11 :** 9k  
 RNA Area: 183.7  
 RNA Concentration: 546 pg/µl  
 rRNA Ratio [28s / 18s]: 0.0  
 RNA Integrity Number (RIN): 2.5 (B.02.08)  
 Result Flagging Color:    
 Result Flagging Label: RIN: 2.50
